# Supplementary material
Source: publisher figshare collection journal article supplement (https://acs.figshare.com/ndownloader/files/4170871)

Supporting Information for

**Preparation of Super-Stable Gold Nanorods via Encapsulation into Block  
Copolymer Micelles**

Dae Hwan Kim,<sup>1</sup> Alexander Wei,<sup>2</sup> and You-Yeon Won<sup>1,\*</sup>

*<sup>1</sup>School of Chemical Engineering, and <sup>2</sup>Department of Chemistry, Purdue University, West*

*<sup>1</sup>Lafayette, Indiana 47907*

---

\* To whom correspondence should be addressed. E-mail: yywon@ecn.purdue.edu

**Figure S1.** Mean hydrodynamic diameter of PEO<sub>113</sub>-PnBA<sub>89</sub> BCP micelles in a water/DMF mixture, as a function of  $w_{\text{water}}$  and time. The shaded area represents a solvent composition window in which the BCP molecules aggregate into metastable colloids, signifying a medium for rapid exchange.

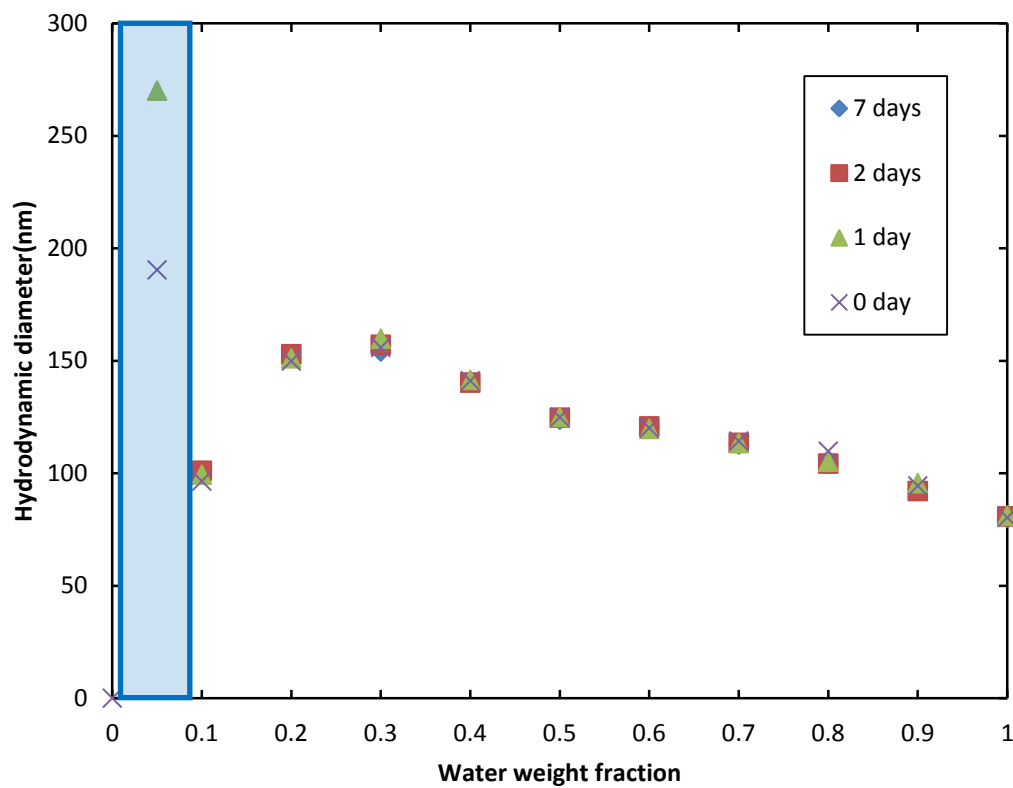

**Figure S2.** Representative DLS intensity autocorrelation functions and intensity-weighted size distributions (obtained by log-normal analysis) for **(A)** PEO<sub>113</sub>-PnBA<sub>57</sub>-coated GNRs (prepared by surfactant exchange at  $w_{\text{water}} = 0.35$ ) in pure water (DLS data taken at  $t = 0$ , ~3 and ~6 months after preparation), **(B)** PEO<sub>113</sub>-PnBA<sub>57</sub>-coated GNRs (prepared by surfactant exchange at  $w_{\text{water}} = 0.35$ ) in 150-mM NaCl solution (at  $t = 0$ , ~3 and ~6 months after exposure to 150 mM NaCl), and **(C)** CTAB-coated GNRs in 150-mM NaCl solution (at  $t = 0$ , 1 and 2 days after exposure to 150 mM NaCl).

**(A)**

$t = 0$

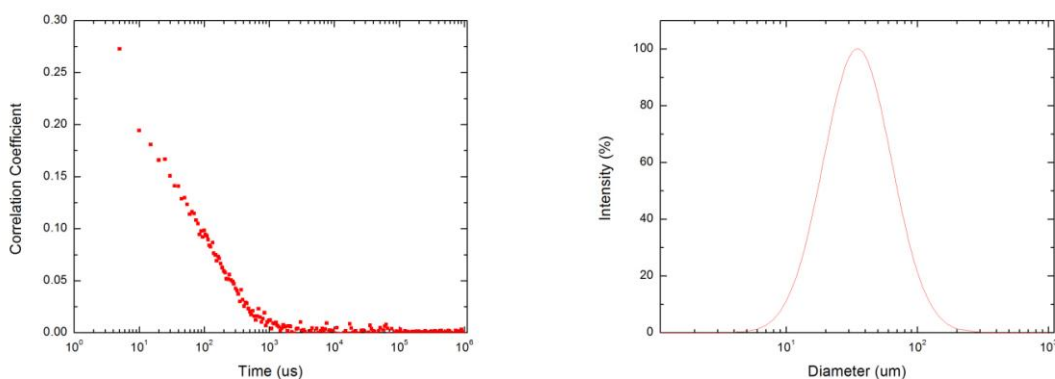

$t = \sim 3$  months

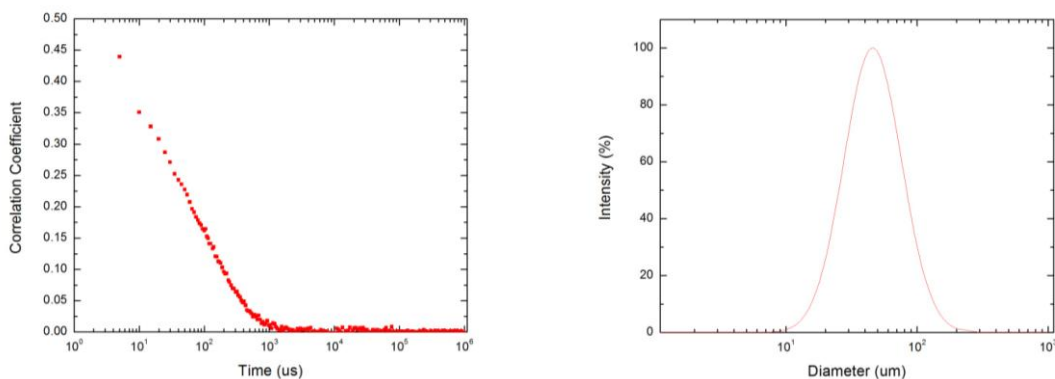

$t = \sim 6$  months

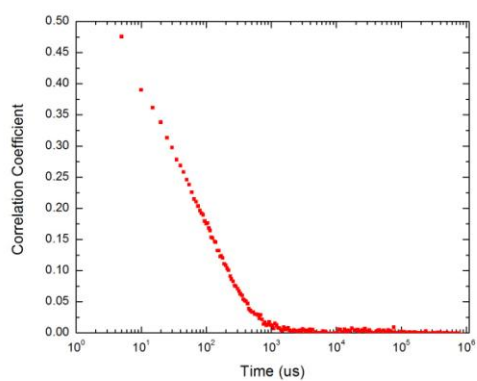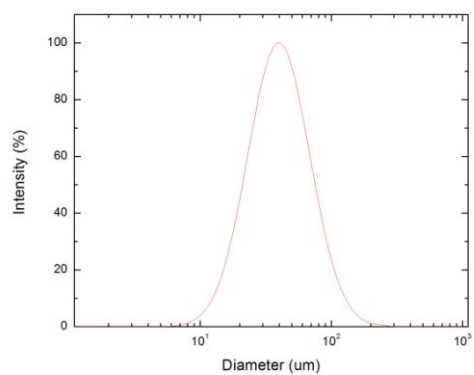

**(B)**

$t = 0$

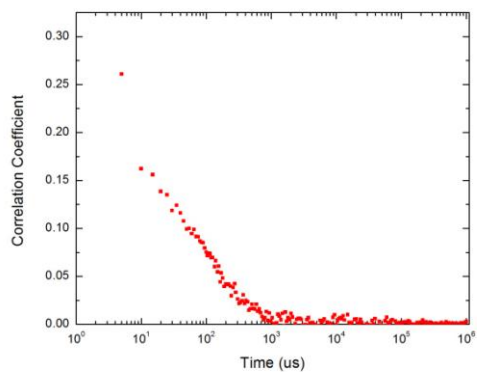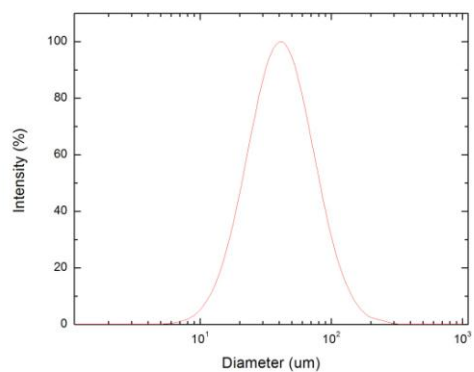

$t = \sim 3$  months

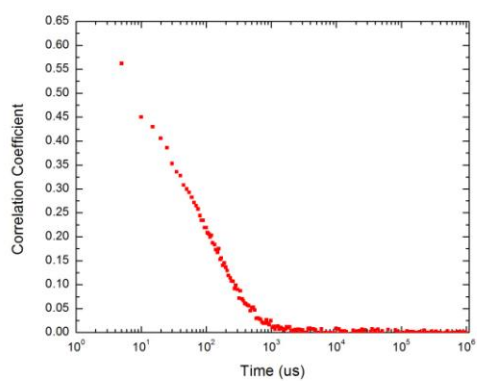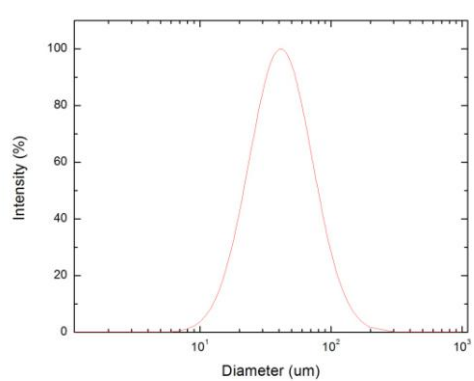

$t = \sim 6$  months

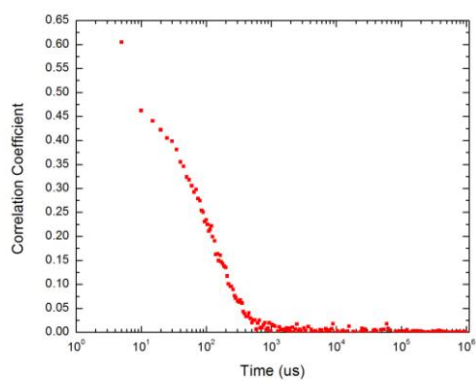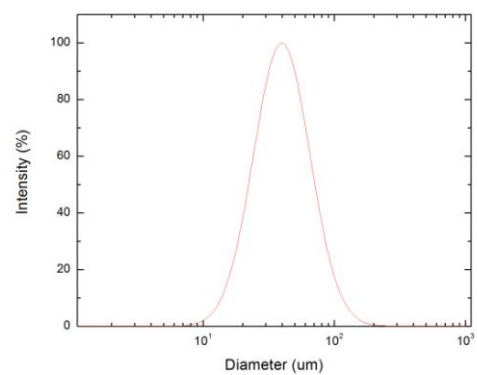

(C)

$t = 0$

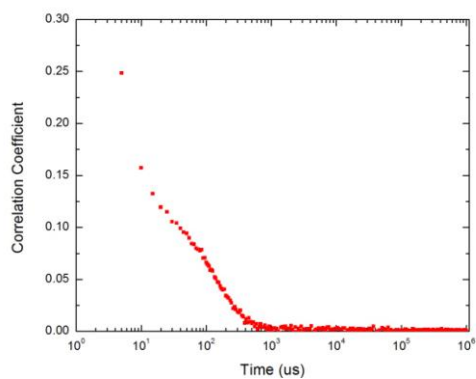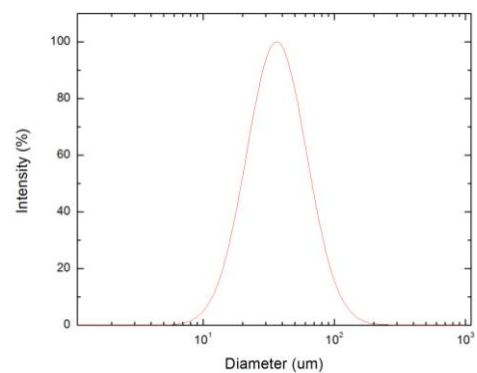

$t = 1$  day

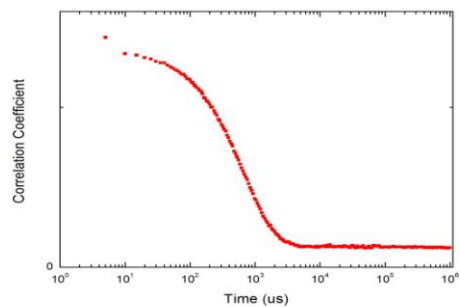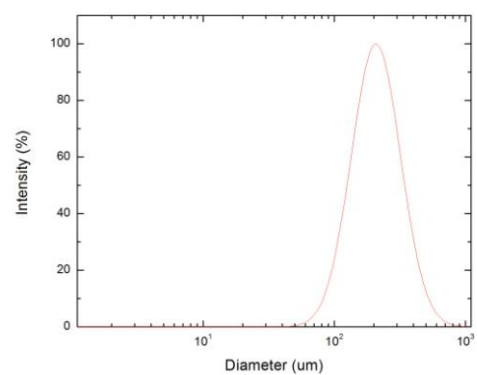

$t = 2$  days

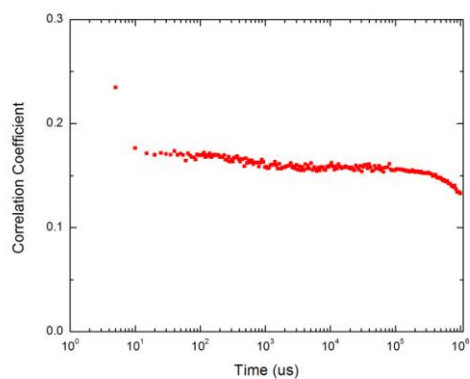

**Figure S3.** Representative UV-vis absorption spectra **(A)** for PEO<sub>113</sub>-PnBA<sub>57</sub>-coated GNRs (prepared by surfactant exchange at  $w_{water} = 0.35$ ) in pure water (absorbance data taken at  $t = 17$  days after preparation), PEO<sub>113</sub>-PnBA<sub>57</sub>-coated GNRs (prepared by surfactant exchange at  $w_{water} = 0.35$ ) in 150-mM NaCl solution (at  $t = 3$  days after exposure to 150 mM NaCl), and CTAB-coated GNRs in pure water (as synthesized), and **(B)** for CTAB-coated GNRs in 150-mM NaCl solution (at  $t = 0, 1$  and 3 days after exposure to 150 mM NaCl).

**(A)**

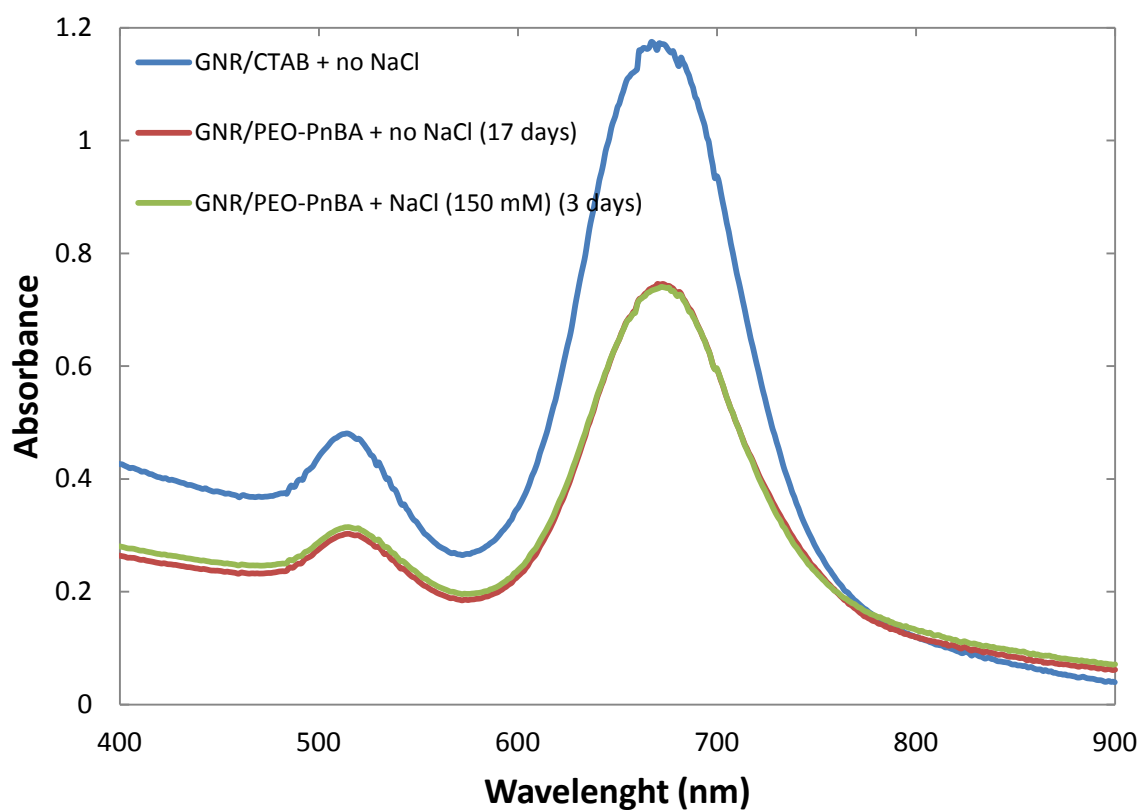

**(B)**

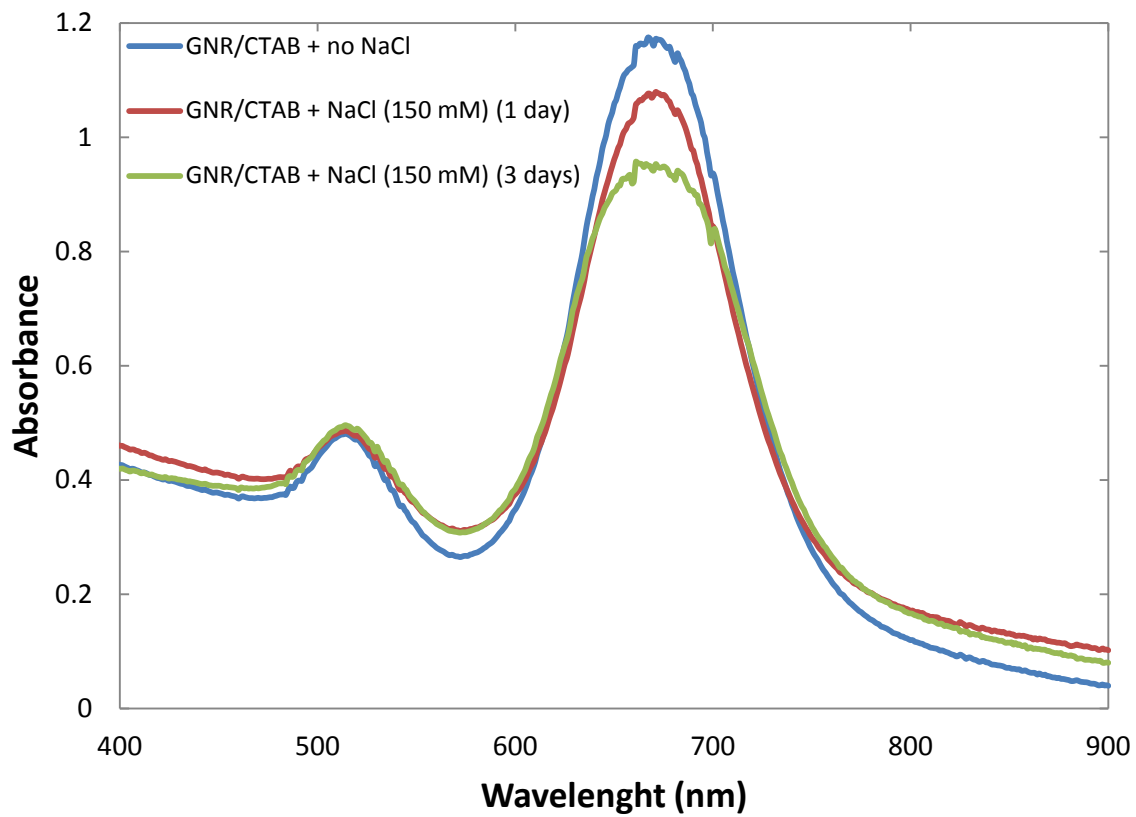



**Figure S4.** Additional TEM images of PEO<sub>113</sub>-PnBA<sub>57</sub> BCP-coated GNRs (prepared by surfactant exchange at a solvent composition of  $w_{\text{water}} = 0.35$ ) stored in pure water for 17 days after preparation. The TEM specimens were negatively stained with 2% uranyl acetate.

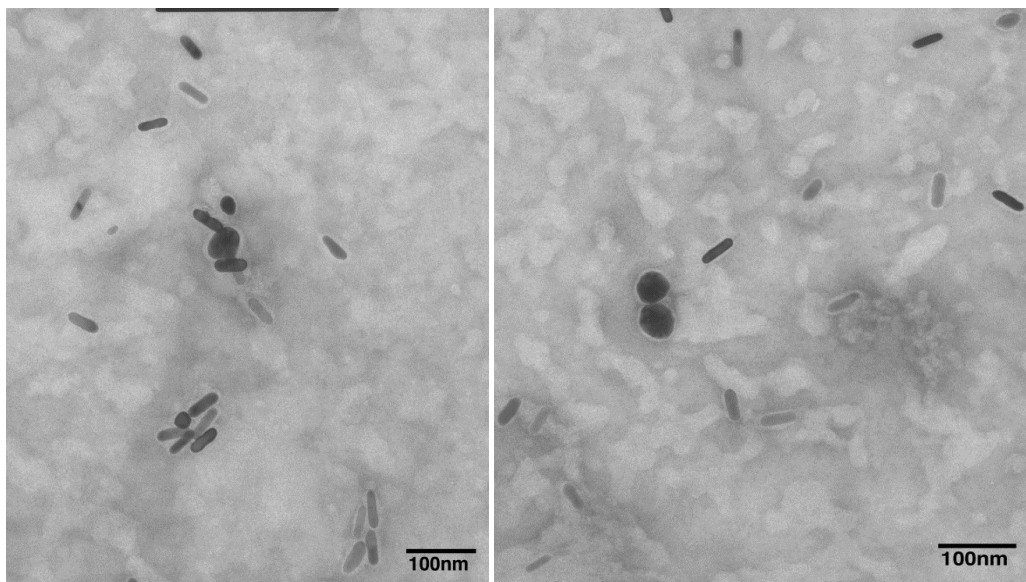

**Figure S5.** Additional TEM images of CTAB-coated GNRs **(A)** as synthesized in water or **(B)** stored in 150 mM NaCl for 3 days. The TEM specimens were negatively stained with 2% uranyl acetate.

**(A)**

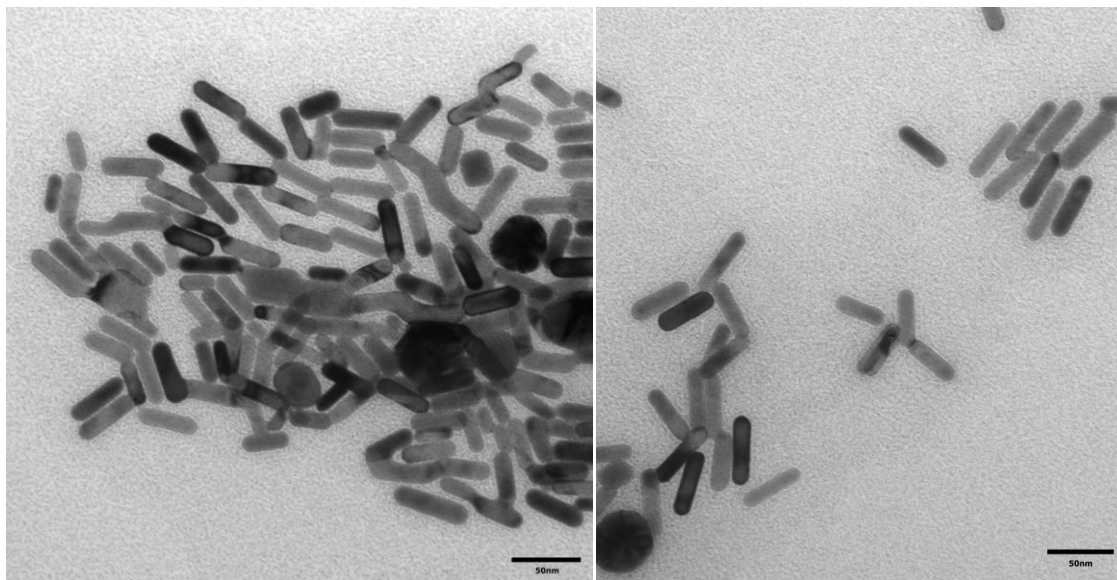

**(B)**

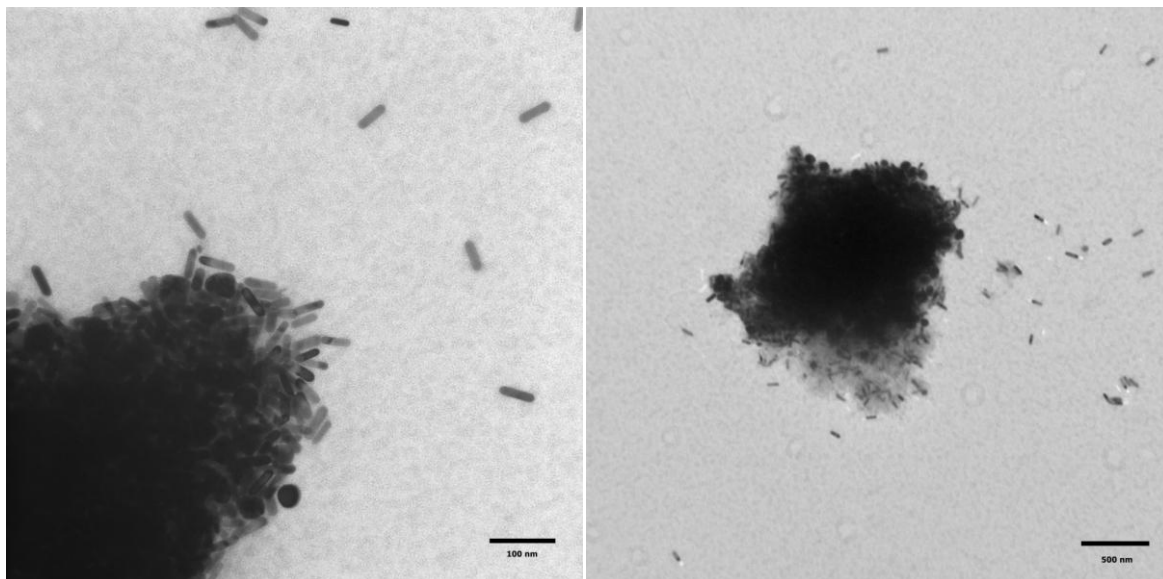

**Figure S6.** TEM images demonstrating an unsuccessful BCP encapsulation trial conducted at a solvent composition outside the determined range for optimal CTAB exchange (discussed in Section 2.2). In this example, the surfactant exchange process was undertaken with PEO<sub>113</sub>-PnBA<sub>57</sub> at a solvent composition of  $w_{\text{water}} = 0.20$ . The TEM specimens were negatively stained with 2% uranyl acetate. The specific sample preparation procedure used is as follows: A solution containing 0.01 mg/ml GNR (coated with CTAB) was prepared in a water/DMF mixture at  $w_{\text{water}} = 0.40$ . A 1.0 mg/ml solution of PEO<sub>113</sub>-PnBA<sub>57</sub> in pure DMF was also separately prepared. Equal amounts (by weight) of these two solutions were mixed so that the final solvent composition was a water weight fraction of 0.20. The resultant mixture was sonicated for 30 minutes in a bath sonicator. Additional 1.2 g of water was added to make final solvent composition  $w_{\text{water}} = 0.50$ , again followed by 30 minutes of sonication. The GNR suspension was then dialyzed in a dialysis bag (molecular weight cutoff 3,000) for 2 days against a large volume of deionized water (regularly replaced with fresh water) in order to remove residual DMF and CTAB.

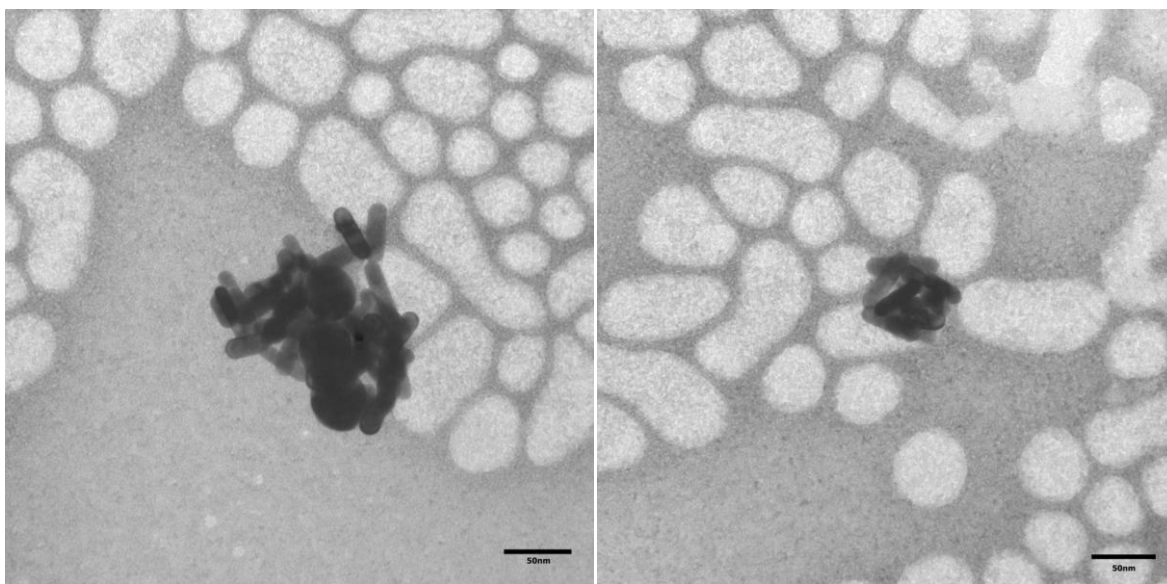

**Figure S7.** TEM images demonstrating an unsuccessful BCP encapsulation trial conducted at a solvent composition outside the determined range for optimal CTAB exchange (discussed in Section 2.2). In this example, the surfactant exchange process was undertaken with PEO<sub>113</sub>-PnBA<sub>57</sub> at a solvent composition of  $w_{water} = 0.50$ . The TEM specimens were negatively stained with 2% uranyl acetate. The specific sample preparation procedure used is as follows: A solution containing 0.01 mg/ml GNR (coated with CTAB) was prepared in a water. A 1.0 mg/ml solution of PEO<sub>113</sub>-PnBA<sub>57</sub> in pure DMF was also separately prepared. Equal amounts (by weight) of these two solutions were mixed so that the final solvent composition was a water weight fraction of 0.50. The resultant mixture was sonicated for 60 minutes in a bath sonicator. The GNR suspension was then dialyzed in a dialysis bag (molecular weight cutoff 3,000) for 2 days against a large volume of deionized water (regularly replaced with fresh water) in order to remove residual DMF and CTAB.

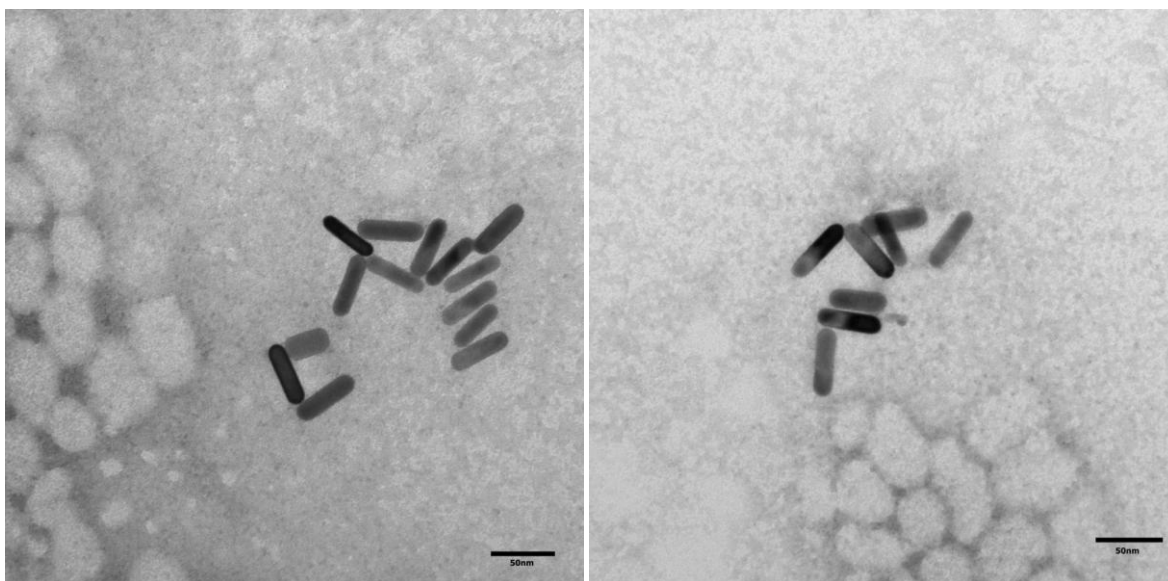

**Figure S8.** TEM images demonstrating an unsuccessful BCP encapsulation trial conducted at a solvent composition outside the determined range for optimal CTAB exchange (discussed in Section 2.2). In this example, the surfactant exchange process was undertaken with PEO<sub>113</sub>-PnBA<sub>89</sub> at a solvent composition of  $w_{\text{water}} = 0.05$ . The TEM specimens were negatively stained with 2% uranyl acetate. The specific sample preparation procedure used is as follows: A solution containing 0.01 mg/ml GNR (coated with CTAB) was prepared in a water/DMF mixture at  $w_{\text{water}} = 0.10$ . A 1.0 mg/ml solution of PEO<sub>113</sub>-PnBA<sub>89</sub> in pure DMF was also separately prepared. Equal amounts (by weight) of these two solutions were mixed so that the final solvent composition was a water weight fraction of 0.05. The resultant mixture was sonicated for 30 minutes in a bath sonicator. Additional 1.8 g of water was added to make final solvent composition  $w_{\text{water}} = 0.50$ , again followed by 30 minutes of sonication. The GNR suspension was then dialyzed in a dialysis bag (molecular weight cutoff 3,000) for 2 days against a large volume of deionized water (regularly replaced with fresh water) in order to remove residual DMF and CTAB.

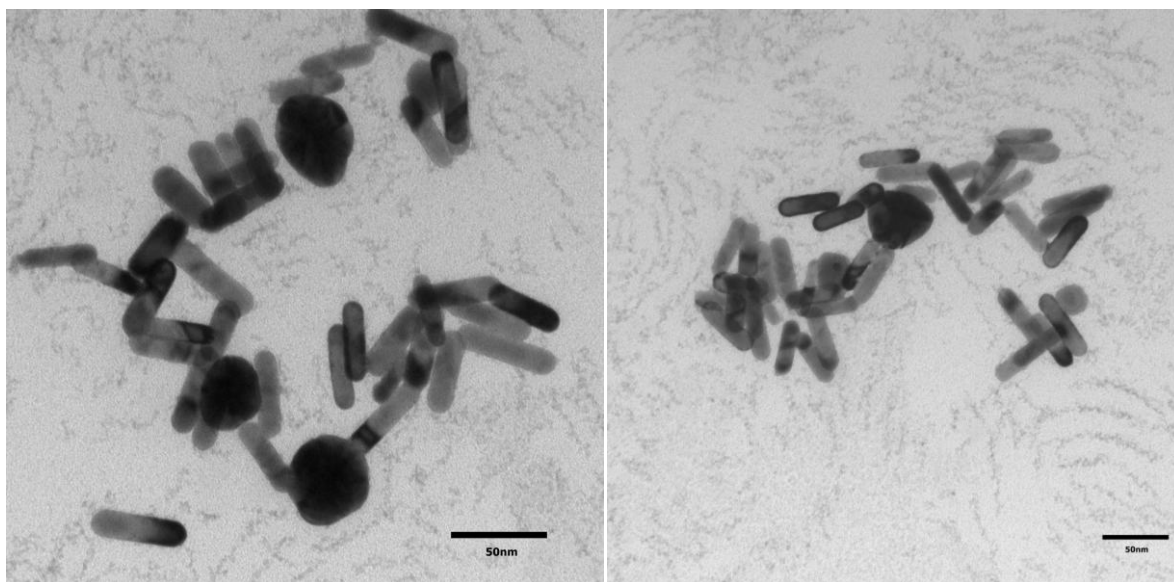

Supplement: Supplementary file 1 [file 4170871]
